# Supplementary material for: Structural and Evolutionary Analysis Indicate that the SARS-CoV-2 Mpro is an Inconvenient Target for Small-Molecule Inhibitors Design
Source: bioRxiv or medRxiv preprint supplement (doi:10.1101/2020.02.27.968008), 2020-04-06
Supplement: Supplementary file [file media-1.pdf]

## SUPPLEMENTARY INFORMATION

### **Molecular Dynamics Simulations Indicate the COVID-19 Mpro Is Not a Viable Target for Small-Molecule Inhibitors Design**

Maria Bzówka<sup>1#</sup>, Karolina Mitusińska<sup>1#</sup>, Agata Raczyńska<sup>1</sup>, Aleksandra Samol<sup>1</sup>, Jack Tuszyński<sup>2,3</sup>, Artur Góra<sup>1\*</sup>

1) Tunneling Group, Biotechnology Centre, ul. Krzywoustego 8, Silesian University of Technology, Gliwice, 44-100, Poland

2) Department of Physics, University of Alberta, Edmonton, AB, T6G 2E1, Canada

3) DIMEAS, Politecnico di Torino, Corso Duca degli Abruzzi, 24, Turin, 10129, Italy

\*Corresponding author

#These authors contributed equally to this work

Supplementary Table S1. Differences between COVID-2019 and SARS-CoV Mpros sequences. The last column shows differences in total energies (in kcal/mol) calculated as differences in Gibbs free energy folding between SARS-CoV Mpro and introduced single-point mutations as they are in COVID-19 Mpro structure.

| ID                                                                               | COVID-19 Mpro | SARS-CoV Mpro | domain | buried/exposed (based on the NetSurfP calculations) | total energy differences [kcal/mol] (based on the FoldX calculations) |
|----------------------------------------------------------------------------------|---------------|---------------|--------|-----------------------------------------------------|-----------------------------------------------------------------------|
| 35                                                                               | V             | T             | I      | B                                                   | 0.90                                                                  |
| 46                                                                               | S             | A             | I      | B                                                   | 0.14                                                                  |
| 65                                                                               | N             | S             | I      | B(COVID)/<br>E(SARS)                                | 0.32                                                                  |
| 86                                                                               | V             | L             | I      | B                                                   | 2.76                                                                  |
| 88                                                                               | K             | R             | I      | E                                                   | -0.42                                                                 |
| 94                                                                               | A             | S             | I      | E                                                   | -0.41                                                                 |
| 134                                                                              | F             | H             | II     | E                                                   | -0.85                                                                 |
| 180                                                                              | N             | K             | II     | E                                                   | 1.29                                                                  |
| 202                                                                              | V             | L             | III    | B                                                   | 1.78                                                                  |
| 267                                                                              | S             | A             | III    | B                                                   | 2.18                                                                  |
| 285                                                                              | A             | T             | III    | E                                                   | -0.37                                                                 |
| 286                                                                              | L             | I             | III    | E                                                   | -0.08                                                                 |
| Changes in the protein's sequence, not present in the crystallographic structure |               |               |        |                                                     |                                                                       |
| 305                                                                              | F             | Q             |        | E                                                   |                                                                       |
| 306                                                                              | Q             | G             |        | E                                                   |                                                                       |

Supplementary Table S2. The volumes of the *Outer* pocket volumes [ $\text{\AA}^3$ ] in *time-window* mode.

| Time    | COVID-19 Mpro | SARS-CoV Mpro | SARS-CoV Mpro-f |
|---------|---------------|---------------|-----------------|
| 0-10ns  | 142           | 212           | 319             |
| 10-20ns | 169           | 260           | 302             |
| 20-30ns | 90            | 246           | 226             |
| 30-40ns | 90            | 153           | 271             |
| 40-50ns | 98            | 289           | 266             |
| average | 118           | 232           | 277             |

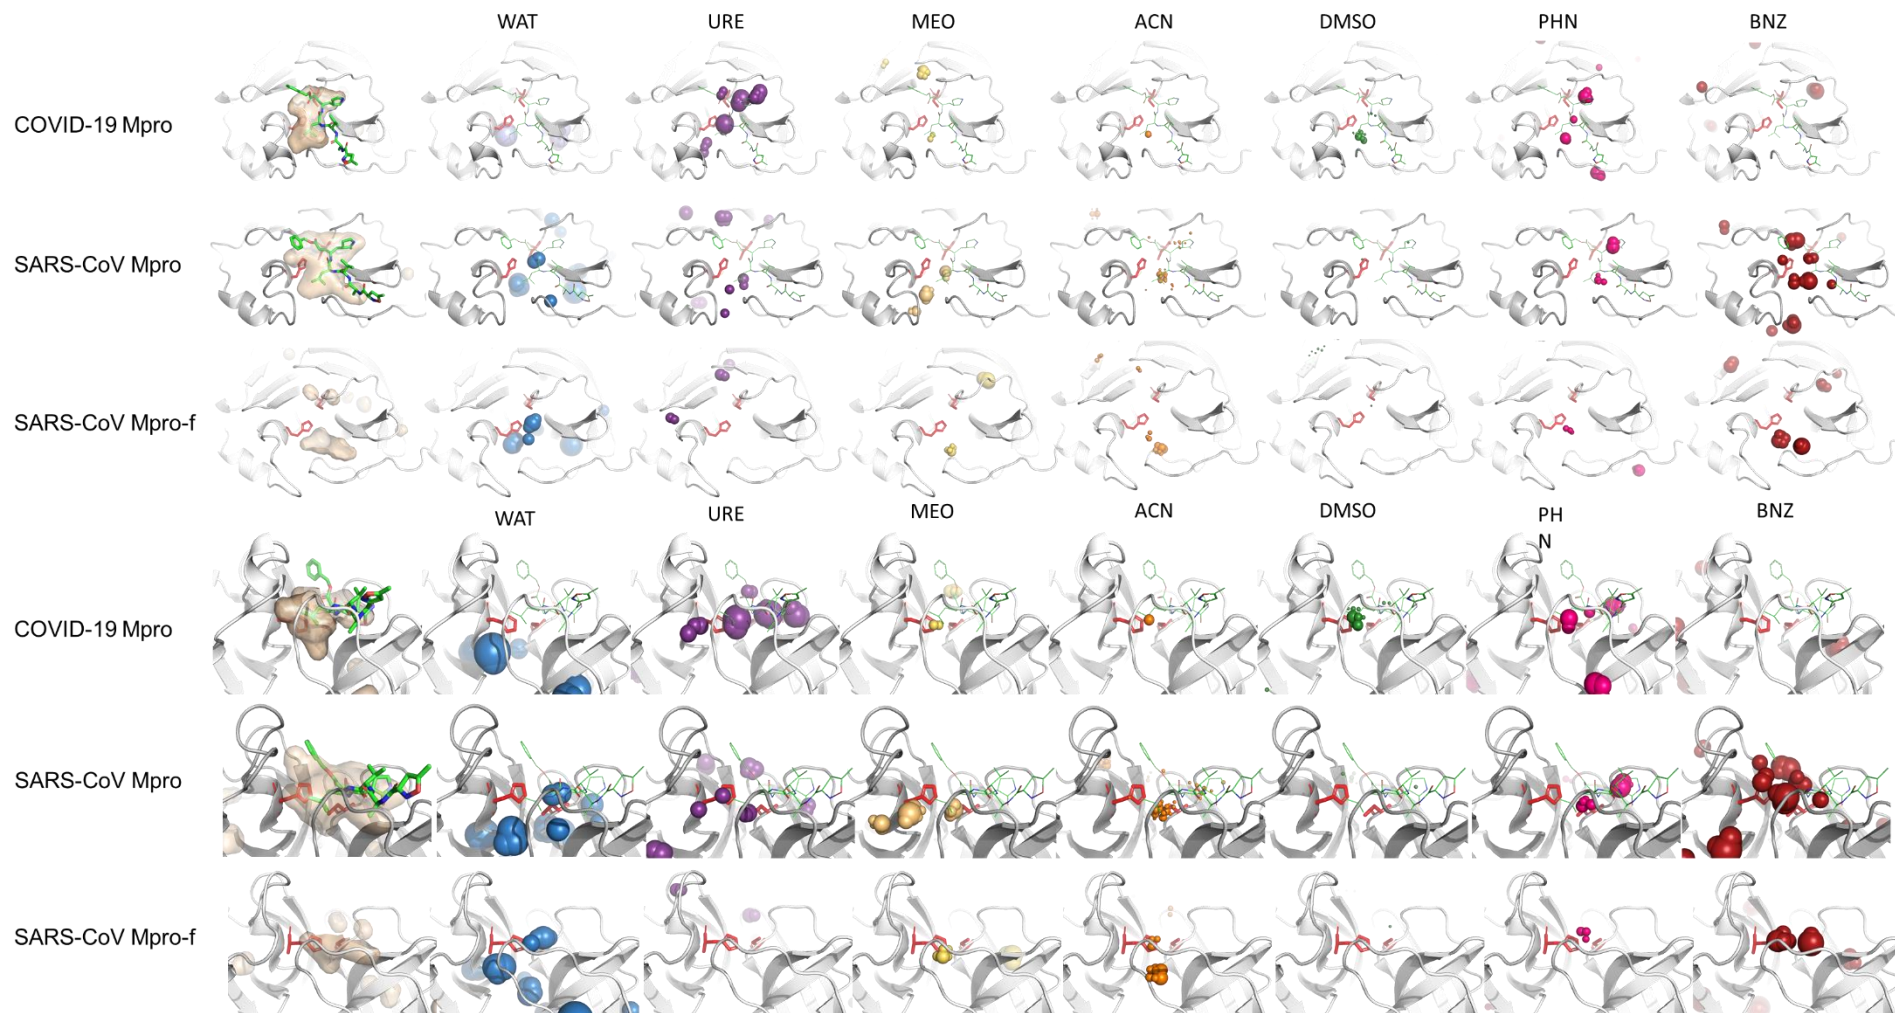

Supplementary Figure S1. Localisation of the global hot-spots of all analysed Mpros: COVID-19 Mpro, SARS-CoV Mpro and SARS-CoV Mpro-f. Hot-spots for individual cosolvents are represented by spheres, and their size reflects the hot-spots density. The colour-coding is as follows: purple - urea, green - DMSO, yellow - methanol, orange - acetonitrile, pink - phenol, red - benzene. The active site residues are shown as red sticks, the N3 inhibitor structure as green lines, and the proteins' structures are shown in cartoons representation.

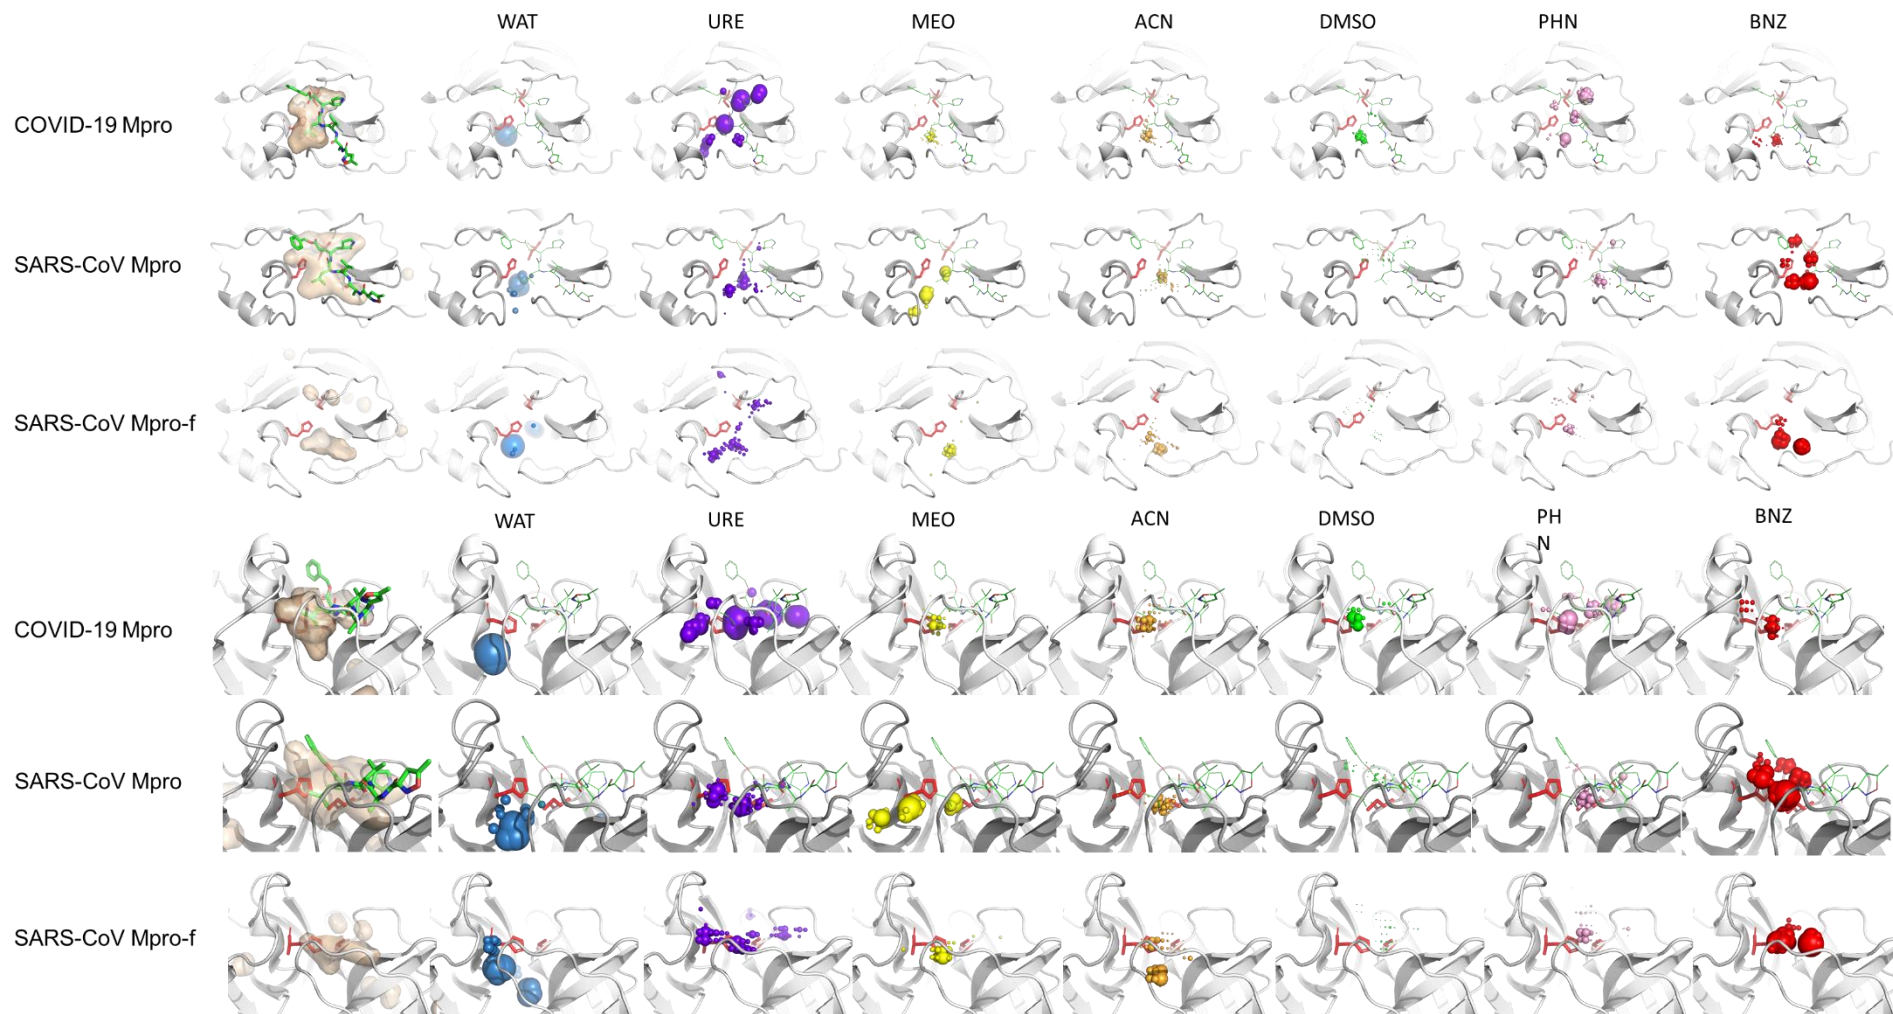

Supplementary Figure S2. Localisation of the local hot-spots of all analysed Mpros: COVID-19 Mpro, SARS-CoV Mpro and SARS-CoV Mpro-f. Hot-spots for individual cosolvents are represented by spheres, and their size reflects the hot-spots density. The colour-coding is as follows: purple - urea, green - DMSO, yellow - methanol, orange - acetonitrile, pink - phenol, red - benzene. The active site residues are shown as red sticks, the N3 inhibitor structure as green lines, and the proteins' structures are shown in cartoons representation.

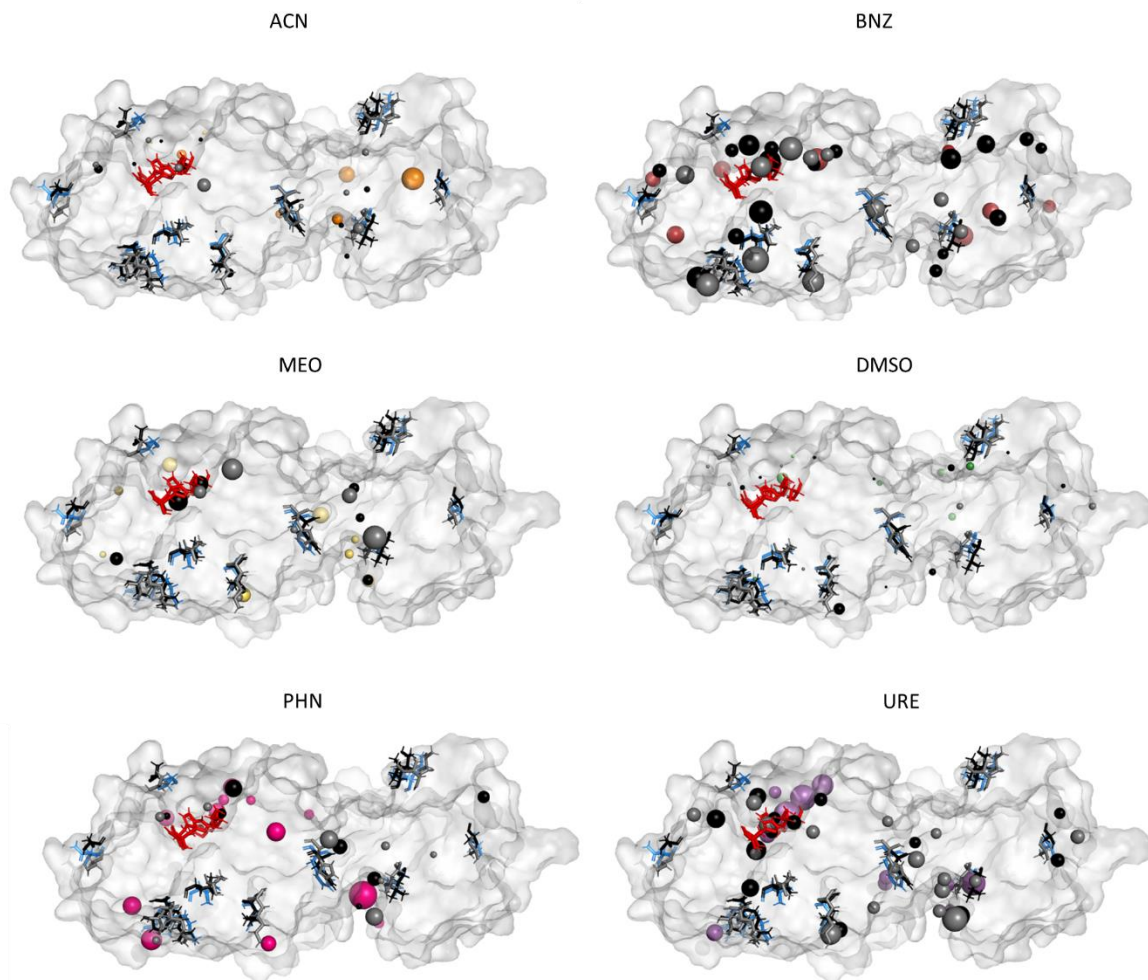

Supplementary Figure S3. Localisation of the global hot-spots of all analysed Mpros: COVID-19 Mpro, SARS-CoV Mpro and SARS-CoV Mpro-f. The structures of all three analysed Mpro structures are superposed and the colour-coding is as follows: orange, red, yellow, green, pink and purple hot-spots are from the COVID-19 Mpro, grey hot-spots from the SARS-CoV Mpro-f and black hot-spots from the SARS-CoV Mpro structure. The active site residues are shown as red sticks, the differing residues of the COVID-19 Mpro as blue sticks, and the proteins' structures are shown in surface representation.



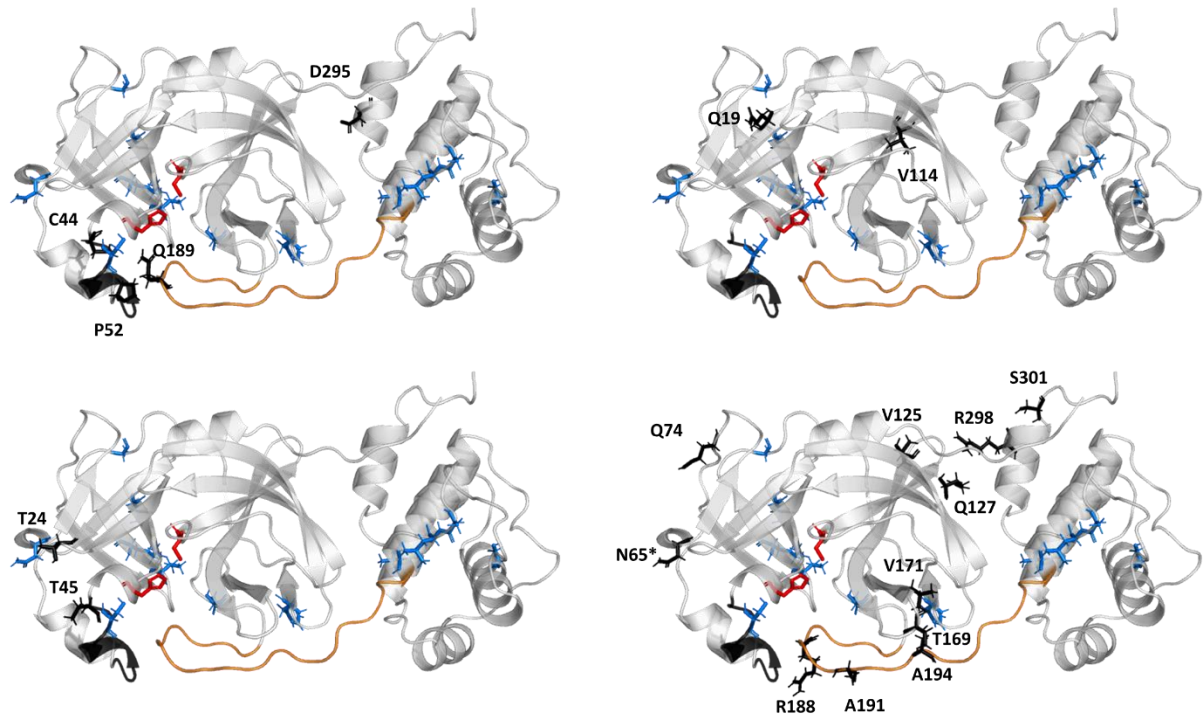

Supplementary Figure 4. Localisation of the evolutionary correlated residues of Mpro (black sticks). The CMA analysis provided four groups of evolutionary correlated residues. The COVID-19 Mpro structure is presented as cartoon, the active site residues are shown as red sticks, the unique residues of the COVID-19 Mpro as blue sticks, the asterisks indicates unique residue that belong to evolutionary correlated residues. The loop C44-P52 is coloured black and F185-T201 loop is orange. Please note, that within one of the correlated groups (upper left) the residues from C44-P52 loop are correlated with Q189 from the linker loop and with residue from III domain.

Supplementary Table S3. FoldX results for the most energetically favourable potential mutations in the COVID-19 Mpro structure. Amino acids from the binding cavity are marked **bold**.

| Mutation     | Energy difference [kcal/mol] | buried/exposed (based on the NetSurfP calculations) |
|--------------|------------------------------|-----------------------------------------------------|
| A260D        | -3.67                        | E                                                   |
| Y154H        | -2.04                        | E                                                   |
| T21I         | -2.01                        | B                                                   |
| <b>H41L</b>  | <b>-1.95</b>                 | <b>B</b>                                            |
| Q127L        | -1.89                        | E                                                   |
| A194P        | -1.82                        | E                                                   |
| A129V        | -1.75                        | B                                                   |
| Q306R        | -1.73                        | E                                                   |
| <b>H164L</b> | <b>-1.71</b>                 | <b>B</b>                                            |
| S301L        | -1.68                        | E                                                   |
| V233L        | -1.58                        | B                                                   |
| Q244P        | -1.54                        | E                                                   |
| N53D         | -1.51                        | E                                                   |



Supplementary Table S4. FoldX results for binding cavity amino acids (7Å within the N3 inhibitor). Catalytic dyad is marked **bold**.

| Mutation     | Energy [kcal/mol] | buried/exposed<br>(based on the NetSurfP calculations) |
|--------------|-------------------|--------------------------------------------------------|
| <b>H41L</b>  | <b>-1.95</b>      | <b>B</b>                                               |
| H164L        | -1.71             | B                                                      |
| T169I        | -1.49             | E                                                      |
| T45S         | -0.93             | E                                                      |
| E47Q         | -0.91             | E                                                      |
| T24R         | -0.84             | E                                                      |
| S46P         | -0.81             | B                                                      |
| Q189L        | -0.79             | E                                                      |
| T26K         | -0.78             | E                                                      |
| <b>C145F</b> | <b>-0.77</b>      | <b>B</b>                                               |
| A191P        | -0.58             | E                                                      |
| H163Y        | -0.55             | B                                                      |
| E166Q        | -0.43             | E                                                      |
| L50R         | -0.37             | E                                                      |
| A193T        | -0.36             | E                                                      |
| H172L        | -0.35             | B                                                      |
| D187A        | -0.35             | E                                                      |
| V186F        | -0.30             | E                                                      |
| L141R        | -0.28             | B                                                      |
| N142Y        | -0.22             | B                                                      |
| N119Y        | -0.08             | E                                                      |
| S144A        | -0.08             | B                                                      |
| A173V        | -0.02             | B                                                      |
| T190I        | 0.05              | E                                                      |
| Q192L        | 0.22              | E                                                      |
| S147T        | 0.29              | B                                                      |
| N28I         | 0.37              | B                                                      |
| Y54F         | 0.40              | B                                                      |
| C44S         | 0.41              | B                                                      |
| M49L         | 0.42              | B                                                      |
| V42L         | 0.74              | B                                                      |
| Y118F        | 0.78              | B                                                      |
| T25A         | 0.84              | E                                                      |
| L27I         | 1.04              | B                                                      |
| F140Y        | 1.09              | B                                                      |
| F181Y        | 1.37              | B                                                      |
| F185L        | 1.47              | E                                                      |
| P52A         | 1.54              | E                                                      |
| L167I        | 2.30              | B                                                      |
| G143R        | 2.42              | B                                                      |
| P39A         | 3.21              | B                                                      |
| R40I         | 3.50              | E                                                      |
| G146A        | 9.72              | B                                                      |

Supplementary Table S5. The final percentage concentration of particular cosolvents for both COVID-19 and SARS-CoV Mpros systems.

| Cosolvent | Concentration [%] | Number of added molecules - COVID-19 Mpro | Number of added molecules – SARS-CoV Mpro | Number of added molecules – SARS-CoV Mpro-f |
|-----------|-------------------|-------------------------------------------|-------------------------------------------|---------------------------------------------|
| ACN       | 4.5               | ACN: 450<br>WAT: 19712                    | ACN: 450<br>WAT: 19801                    | ACN: 450<br>WAT: 19858                      |
| BNZ       | 1.0               | BNZ: 50<br>WAT: 19712                     | BNZ: 50<br>WAT: 19801                     | BNZ: 50<br>WAT :19858                       |
| DMSO      | 4.8               | DMSO: 250<br>WAT: 19712                   | DMSO: 250<br>WAT: 19801                   | DMSO: 250<br>WAT: 19858                     |
| MEO       | 4.3               | MEO: 550<br>WAT: 19712                    | MEO: 550<br>WAT: 19801                    | MEO: 550<br>WAT: 19858                      |
| PHN       | 1.2               | PHN: 50<br>WAT: 19712                     | PHN: 50<br>WAT: 19801                     | PHN: 50<br>WAT: 19858                       |
| URE       | 4.4               | URE: 300<br>WAT: 19712                    | URE: 300<br>WAT: 19801                    | URE: 300<br>WAT: 19858                      |
